# Supplementary material for: Role of STX6 as a prognostic factor associated with immune infiltration in hepatocellular carcinoma
Source: PubMed Central journal article supplement — Oncol Lett. 2022 Sep 5;24(4):371. doi: 10.3892/ol.2022.13491 (PMC9494627; doi:10.3892/ol.2022.13491), 2022-09-05
Supplement: Supplementary_Data.pdf [file Supplementary_Data.pdf]

Table SI. Correlation analysis between syntaxin 6 and related genes and markers of immune cells using the TIMER database.

| Cell type      | Gene markers         | None    |         | Purity  |         |
|----------------|----------------------|---------|---------|---------|---------|
|                |                      | R-value | P-value | R-value | P-value |
| TAM            | CCL2                 | 0.271   | ***     | 0.300   | ***     |
|                | CD68                 | 0.298   | ***     | 0.314   | ***     |
|                | IL10                 | 0.310   | ***     | 0.338   | ***     |
|                | VSIG4                | 0.222   | ***     | 0.254   | ***     |
|                | MS4A4A               | 0.202   | ***     | 0.234   | ***     |
|                | CD204 (MSR1)         | 0.371   | ***     | 0.414   | ***     |
| M1 macrophage  | CD80                 | 0.426   | ***     | 0.477   | ***     |
|                | CD86                 | 0.381   | ***     | 0.442   | ***     |
|                | TLR2                 | 0.346   | ***     | 0.367   | ***     |
| M2 macrophage  | CSF1R (CD115)        | 0.321   | ***     | 0.375   | ***     |
|                | CLEC10A (CD301)      | 0.233   | ***     | 0.242   | ***     |
|                | CD163                | 0.173   | ***     | 0.190   | ***     |
| Dendritic cell | BDCA-1 (CD11c)       | 0.292   | ***     | 0.280   | ***     |
|                | BDCA-4 (NRP1)        | 0.497   | ***     | 0.485   | ***     |
|                | CD11c (ITGAX)        | 0.425   | ***     | 0.483   | ***     |
|                | THBD                 | 0.232   | ***     | 0.239   | ***     |
| Th1            | T-bet (TBX21)        | 0.142   | **      | 0.159   | **      |
|                | STAT4                | 0.293   | ***     | 0.313   | **      |
|                | TNF- $\alpha$ (TNF)  | 0.338   | ***     | 0.377   | ***     |
|                | CD4                  | 0.206   | ***     | 0.211   | ***     |
| Th2            | GATA3                | 0.331   | ***     | 0.388   | ***     |
|                | STAT6                | 0.311   | **      | 0.298   | **      |
|                | STAT5A               | 0.405   | ***     | 0.411   | ***     |
| Tfh            | BCL6                 | 0.348   | ***     | 0.352   | ***     |
|                | IL21                 | 0.123   | *       | 0.137   | *       |
| Th17           | STAT3                | 0.364   | ***     | 0.371   | ***     |
|                | IL17A                | 0.104   | *       | 0.114   | *       |
| Treg           | FOXP3                | 0.104   | *       | 0.11    | *       |
|                | CCR8                 | 0.457   | ***     | 0.497   | ***     |
|                | STAT5B               | 0.425   | ***     | 0.429   | ***     |
|                | TGF- $\beta$ (TGFB1) | 0.509   | ***     | 0.55    | ***     |

None, correlation without adjustment; Purity, correlation adjusted by tumor purity. TIMER; Tumor Immune Estimation Resource; TAM, tumor-associated macrophage; Th, T helper; Tfh, follicular helper

T; Treg, regulatory T cell; CCL2, CC motif chemokine ligand 2; VSIG4, V-set and immunoglobulin domain containing 4; MS4A4A, membrane spanning 4-domains A4A; MSR1, macrophage scavenger receptor 1; TLR2, toll-like receptor 2; CSF1R, colony stimulating factor 1 receptor; CLEC10A, C-type lectin domain containing 10A; BDCA, C-type lectin domain family 4 member C; THBD, thrombomodulin; TBX21, T-box transcription factor 21; GATA3, GATA binding protein 3; BCL6, B-cell lymphoma 6; FOXP3, forkhead box P3; CCR8, C-C motif chemokine receptor 8.
